# Supplementary material for: Hypermasculinised facial morphology in boys and girls with Autism Spectrum Disorder and its association with symptomatology
Source: PubMed Central journal article supplement (PMC5570931; doi:10.1038/s41598-017-09939-y), 2017-08-24
Supplement: 41598_2017_9939_MOESM1_ESM.pdf [file 41598_2017_9939_MOESM1_ESM.pdf]

# **Hypermasculinised facial morphology in boys and girls with Autism Spectrum Disorder and its association with symptomatology**

Diana Weiting Tan<sup>1,2,†,\*</sup>, Syed Zulqarnain Gilani<sup>3,†</sup>, Murray T. Maybery<sup>1</sup>, Ajmal Mian<sup>3</sup>, Anna Hunt<sup>2</sup>, Mark Walters<sup>4</sup>, and Andrew J.O. Whitehouse<sup>2</sup>

<sup>1</sup>Neurocognitive Developmental Unit, School of Psychological Science, University of Western Australia, Perth, 6009, Western Australia, Australia

<sup>2</sup>Telethon Kids Institute, University of Western Australia, Perth, 6008, Western Australia, Australia

<sup>3</sup>School of Computer Science and Software Engineering, University of Western Australia, Perth, 6009, Western Australia, Australia

<sup>4</sup>Craniomaxillofacial Department, Princess Margaret Hospital for Children, Perth, 6008, Western Australia, Australia

†These authors contributed equally to this work.

\*diana.tan@uwa.edu.au

## Supplementary Tables

**Table S1**

Means (standard deviations) and statistical outcomes for the effects of age on each facial feature for the younger (< 8.08 years) and older (> 8.08 years) children in Study 1.

| Facial variables         | Boys ( <i>n</i> = 48) |              | Girls ( <i>n</i> = 53) |              | Age effect       |          |            |
|--------------------------|-----------------------|--------------|------------------------|--------------|------------------|----------|------------|
|                          | Younger               | Older        | Younger                | Older        | <i>F</i> (1, 97) | <i>p</i> | $\eta_p^2$ |
| Linear features (mm)     |                       |              |                        |              |                  |          |            |
| Alar-base width          | 15.0 (1.71)           | 15.9 (2.08)  | 13.2 (1.52)            | 15.0 (1.54)  | 16.5             | < .001   | .15        |
| Nose height              | 42.0 (3.82)           | 46.7 (3.61)  | 37.6 (3.66)            | 44.0 (3.68)  | 56.3             | < .001   | .37        |
| Upper lip height         | 19.8 (2.58)           | 20.8 (2.40)  | 17.5 (2.26)            | 18.0 (2.05)  | <i>ns</i>        |          |            |
| Geodesic features (mm)   |                       |              |                        |              |                  |          |            |
| Outer-canthal width      | 102.2 (8.02)          | 111.2 (6.34) | 96.0 (6.05)            | 104.9 (7.45) | 41.1             | < .001   | .30        |
| Forehead height          | 45.1 (6.67)           | 46.1 (10.33) | 48.9 (7.21)            | 51.9 (6.53)  | <i>ns</i>        |          |            |
| Forehead width           | 148.8 (9.92)          | 156.9 (9.41) | 145.9 (10.3)           | 153.5 (12.6) | 13.8             | < .001   | .12        |
| Right upper cheek height | 63.8 (4.96)           | 68.8 (3.60)  | 63.4 (3.42)            | 67.2 (4.63)  | 27.3             | < .001   | .22        |
| Nasal tip protrusion     | 16.2 (3.15)           | 18.0 (2.11)  | 16.1 (1.57)            | 17.8 (2.65)  | 12.1             | .001     | .11        |
| Nose height              | 50.2 (4.80)           | 56.8 (4.94)  | 45.6 (4.15)            | 53.6 (5.13)  | 58.8             | < .001   | .38        |
| Upper lip height         | 23.8 (3.21)           | 24.9 (3.35)  | 19.7 (2.91)            | 20.7 (1.53)  | <i>ns</i>        |          |            |
| Nasal bridge length      | 33.0 (3.94)           | 37.7 (4.80)  | 31.6 (3.43)            | 37.8 (4.10)  | 45.2             | < .001   | .32        |

**Table S2**

Means (standard deviations) and statistical outcome for the effects of age on each facial feature and the gender score for the younger (< 8.53 years) and older (> 8.53 years) autistic and control boys in Study 2.

| Facial variables       | Autistic boys ( <i>n</i> = 54) |              | Control boys ( <i>n</i> = 54) |              | Age effect        |          |            |
|------------------------|--------------------------------|--------------|-------------------------------|--------------|-------------------|----------|------------|
|                        | Younger                        | Older        | Younger                       | Older        | <i>F</i> (1, 104) | <i>p</i> | $\eta_p^2$ |
| Gender scores          | 6.7 (2.29)                     | 4.1 (2.50)   | 9.5 (2.84)                    | 5.4 (2.16)   | 50.4              | < .001   | .33        |
| Linear features (mm)   |                                |              |                               |              |                   |          |            |
| Alar-base width        | 16.3 (1.70)                    | 17.3 (1.66)  | 15.1 (1.45)                   | 15.8 (1.57)  | <i>ns</i>         |          |            |
| Nose height            | 41.4 (3.11)                    | 47.1 (4.08)  | 38.9 (4.85)                   | 43.0 (4.81)  | 36.1              | < .001   | .26        |
| Upper lip height       | 23.0 (3.04)                    | 24.3 (2.38)  | 20.5 (2.50)                   | 22.0 (2.57)  | 7.8               | .006     | .07        |
| Geodesic features (mm) |                                |              |                               |              |                   |          |            |
| Outer-canthal width    | 105.3 (5.23)                   | 111.5 (8.05) | 98.9 (7.86)                   | 107.6 (6.01) | 32.6              | < .001   | .24        |
| Forehead height        | 42.7 (6.66)                    | 44.1 (6.74)  | 45.0 (7.02)                   | 48.8 (8.56)  | <i>ns</i>         |          |            |
| Nose height            | 50.4 (3.46)                    | 57.5 (4.31)  | 47.3 (5.98)                   | 53.0 (6.13)  | 42.4              | < .001   | .29        |

*Note.* These facial features were significantly different between typically-developing boys and girls in Study 1. An independent sample t-test revealed that the differences in the ages of boys in Study 1 and 2 did not reach statistical significance,  $t(75.6) = 1.49$ ,  $p = .14$ .

**Table S3**

Means (standard deviations) and statistical outcome for the effects of age on each facial feature and the gender score for the younger (< 7.92 years) and older (> 7.92 years) autistic and control girls in Study 2.

| Facial variables       | Autistic girls ( <i>n</i> = 20) |              | Control girls ( <i>n</i> = 60) |              | Age effect       |          |            |
|------------------------|---------------------------------|--------------|--------------------------------|--------------|------------------|----------|------------|
|                        | Younger                         | Older        | Younger                        | Older        | <i>F</i> (1, 76) | <i>p</i> | $\eta_p^2$ |
| Gender scores          | 15.0 (1.67)                     | 11.4 (1.96)  | 17.1 (1.64)                    | 15.7 (1.82)  | 30.0             | < .001   | .28        |
| Linear features (mm)   |                                 |              |                                |              |                  |          |            |
| Alar-base width        | 16.0 (1.72)                     | 16.1 (1.41)  | 13.4 (1.99)                    | 14.8 (1.64)  | <i>ns</i>        |          |            |
| Nose height            | 40.4 (4.28)                     | 47.0 (2.66)  | 37.6 (4.68)                    | 42.5 (4.10)  | <i>ns</i>        |          |            |
| Upper lip height       | 20.5 (2.10)                     | 19.7 (1.86)  | 17.5 (2.11)                    | 16.9 (2.07)  | 27.7             | < .001   | .27        |
| Geodesic features (mm) |                                 |              |                                |              |                  |          |            |
| Outer-canthal width    | 102.7 (5.84)                    | 111.1 (4.95) | 98.5 (7.38)                    | 102.1 (7.66) | 10.7             | .002     | .12        |
| Forehead height        | 48.7 (8.57)                     | 55.6 (5.56)  | 51.3 (10.05)                   | 49.9 (7.24)  | <i>ns</i>        |          |            |
| Nose height            | 49.1 (4.01)                     | 58.3 (3.39)  | 45.0 (5.71)                    | 51.3 (5.32)  | 33.7             | < .001   | .31        |

*Note.* These facial features were significantly different between typically-developing boys and girls in Study 1. An independent sample t-test revealed that the differences in the ages of girls in Study 1 and 2 did not reach statistical significance,  $t(92.9) = 0.20$ ,  $p = .84$ .

As described in the paper, to facilitate the matching of the ASD and control groups on chronological age, facial images of 26 control boys and 41 control girls were used for both Studies 1 and 2, with the images of 28 control boys and 19 control girls used for Study 2 only (i.e., ‘non-overlapping’ samples). To check that the results for Study 2 were not unduly influenced by the overlapping cases, for each sex, we conducted a one-way ANCOVA comparing the gender scores and the six facial features between the ASD group and ‘non-overlapping’ control sample while controlling for the effect of age.

**Table S4**

Means (standard deviations) and statistical outcome for the effects of ASD diagnosis while controlling for the effect of age on each facial feature and the gender score for the autistic and ‘non-overlapping’ control boys in Study 2.

| Facial variables       | Autistic boys ( $n = 54$ ) | Control boys ( $n = 28$ ) | $F(1, 79)$ | $p$   | $\eta_p^2$ |
|------------------------|----------------------------|---------------------------|------------|-------|------------|
| Gender scores          | 5.5 (2.69)                 | 7.9 (2.91)                | 36.3       | <.001 | .32        |
| Linear features (mm)   |                            |                           |            |       |            |
| Alar-base width        | 16.8 (1.75)                | 15.1 (1.18)               | 25.9       | <.001 | .25        |
| Nose height            | 43.9 (4.55)                | 38.2 (3.65)               | 74.1       | <.001 | .48        |
| Upper lip height       | 23.6 (2.83)                | 22.7 (2.24)               | <i>ns</i>  |       |            |
| Geodesic features (mm) |                            |                           |            |       |            |
| Outer-canthal width    | 108.1 (7.27)               | 100.6 (7.32)              | 41.2       | <.001 | .34        |
| Forehead height        | 43.3 (6.67)                | 47.3 (7.13)               | <i>ns</i>  |       |            |
| Nose height            | 53.5 (5.22)                | 46.9 (4.42)               | 82.7       | <.001 | .51        |

**Table S5**

Means (standard deviations) and statistical outcome for the effects of ASD diagnosis while controlling for the effect of age on each facial feature and the gender score for the autistic and 'non-overlapping' control girls in Study 2.

| Facial variables       | Autistic girls ( $n = 20$ ) | Control girls ( $n = 19$ ) | $F(1, 36)$ | $p$   | $\eta_p^2$ |
|------------------------|-----------------------------|----------------------------|------------|-------|------------|
| Gender scores          | 13.2 (2.56)                 | 16.2 (1.48)                | 22.5       | <.001 | .39        |
| Linear features (mm)   |                             |                            |            |       |            |
| Alar-base width        | 16.1 (1.54)                 | 13.7 (2.12)                | 14.7       | <.001 | .29        |
| Nose height            | 43.7 (4.83)                 | 39.2 (4.99)                | <i>ns</i>  |       |            |
| Upper lip height       | 20.1 (1.98)                 | 17.8 (2.46)                | 10.5       | .003  | .23        |
| Geodesic features (mm) |                             |                            |            |       |            |
| Outer-canthal width    | 106.9 (6.80)                | 100.3 (7.55)               | <i>ns</i>  |       |            |
| Forehead height        | 52.2 (7.89)                 | 57.3 (8.64)                | <i>ns</i>  |       |            |
| Nose height            | 53.7 (5.94)                 | 47.0 (6.39)                | 11.3       | .002  | .24        |
